# Supplementary material
Source: Royal Society of Chemistry journal article supplement (doi:10.1039/d6cp01283c)
Supplement: d6cp01283c1.pdf [file d6cp01283c1.pdf]

ESI for manuscript:

**Evaluation of the Solvent Competitive Binding in Halogen and Chalcogen Bonding: A Theoretical Theory Study for Supramolecular Applications**

by

Eric Miguens,<sup>a</sup> Mariana Rocha<sup>b</sup> and Antonio Frontera\*<sup>a</sup>

a. Departament de Química, Universitat de les Illes Balears, Crta de Valldemossa km 7.5, 07122 Palma de Mallorca (Balears), Spain. E-mail: toni.frontera@uib.es.

b. INBIOFAL (CONICET – UNT), Instituto de Química Orgánica. Facultad de Bioquímica, Química y Farmacia, Universidad Nacional de Tucumán, Ayacucho 471, San Miguel de Tucumán, Argentina

Table of Contents

|                      |        |
|----------------------|--------|
| 1. Table 1           | page 2 |
| 2. X-ray coordinates | page 3 |

Table S1. Interaction free energies ( $\Delta G$ , kcal/mol) for complexes **1**, **2**, **3** and **4** with the solvents.

|                  | <b>1</b> | <b>2</b> | <b>3</b> | <b>4</b> |
|------------------|----------|----------|----------|----------|
| water            | 4.8      | 3.7      | 5.5      | 3.8      |
| DMSO             | 6.7      | 3.5      | 5.9      | 2.8      |
| acetonitrile     | 5.9      | 4.6      | 6.2      | 5.0      |
| DMF              | 6.7      | 5.0      | 7.0      | 4.4      |
| methanol         | 6.3      | 4.9      | 6.7      | 5.2      |
| acetone          | 5.2      | 5.1      | 7.0      | 4.6      |
| dichloromethane  | 8.1      | 7.1      | 7.9      | 8.7      |
| trichloromethane | 8.1      | 7.5      | 8.0      | 8.9      |
| diethylether     | 6.9      | 5.6      | 7.3      | 6.1      |

## Cartesian Coordinates

### acetone

6 0.005470 0.177589 -0.000001  
8 -0.022251 1.382664 0.000000  
6 -1.273589 -0.627724 0.000000  
1 -1.861003 -0.352860 -0.878720  
1 -1.103308 -1.704419 -0.000042  
1 -1.860960 -0.352925 0.878768  
6 1.297535 -0.591793 0.000000  
1 1.340131 -1.244733 0.877286  
1 1.340137 -1.244722 -0.877293  
1 2.146510 0.089916 0.000007

### acetonitrile

6 0.000000 0.000000 -1.171282  
1 0.000000 1.024579 -1.546520  
1 -0.887311 -0.512289 -1.546520  
1 0.887311 -0.512289 -1.546520  
6 0.000000 0.000000 0.278763  
7 0.000000 0.000000 1.427811

### diethylether

6 -2.363764 0.408681 0.000025  
1 -3.292144 -0.166709 -0.000031  
1 -2.351793 1.048227 -0.884665  
1 -2.351833 1.048129 0.884798  
6 -1.171632 -0.514488 -0.000062  
1 -1.189862 -1.169892 0.885449  
1 -1.189858 -1.169759 -0.885677  
8 0.000000 0.261210 0.000013  
6 1.171632 -0.514488 0.000064  
1 1.189847 -1.169902 -0.885441  
1 1.189872 -1.169749 0.885685  
6 2.363764 0.408681 -0.000034  
1 2.351814 1.048265 0.884633  
1 3.292144 -0.166708 0.000018  
1 2.351812 1.048090 -0.884829

### dmf

6 -0.858477 -0.641475 -0.000117  
1 -0.751216 -1.743239 -0.000440  
8 -1.938086 -0.094282 0.000344  
7 0.343077 -0.019206 -0.001202  
6 0.420156 1.418584 0.000110  
1 0.952117 1.776089 0.887804  
1 0.950124 1.777973 -0.887994  
1 -0.592838 1.817083 0.001624  
6 1.576379 -0.755544 0.000335  
1 1.366248 -1.826129 0.003690  
1 2.174987 -0.523910 -0.887338  
1 2.175371 -0.518563 0.886341

### dmsO

16 -0.000054 0.233174 -0.437275

8 -0.000159 1.467230 0.382051  
6 -1.340809 -0.797383 0.180043  
1 -2.269859 -0.280747 -0.060952  
1 -1.320174 -1.771514 -0.311957  
1 -1.243372 -0.899172 1.262551  
6 1.341054 -0.797121 0.180006  
1 1.241493 -0.901160 1.262253  
1 1.322623 -1.770347 -0.314080  
1 2.269960 -0.278658 -0.058108

**methanol**

6 0.658759 -0.020111 0.000000  
1 1.081952 0.985069 -0.000065  
1 1.026942 -0.543940 0.891345  
1 1.026931 -0.544049 -0.891284  
8 -0.743678 0.121954 0.000000  
1 -1.138955 -0.752043 0.000001

**water**

8 0.000000 0.000000 0.116716  
1 0.000000 0.761619 -0.466862  
1 0.000000 -0.761619 -0.466862

**cf3br**

6 0.000000 0.000000 -0.814144  
9 0.000000 1.240417 -1.268962  
9 -1.074233 -0.620209 -1.268962  
9 1.074233 -0.620209 -1.268962  
35 0.000000 0.000000 1.118481

**cf3i**

6 0.000000 0.000000 -1.180517  
9 0.000000 1.241057 -1.641125  
9 -1.074787 -0.620529 -1.641125  
9 1.074787 -0.620529 -1.641125  
53 0.000000 0.000000 0.969688

**se(cf3)2**

34 0.000004 1.022359 -0.000014  
6 1.470206 -0.292109 -0.000002  
6 -1.470208 -0.292101 0.000012  
9 1.456335 -1.075900 1.069920  
9 2.601186 0.409986 0.004256  
9 1.461169 -1.070477 -1.073911  
9 -1.456250 -1.076035 -1.069829  
9 -1.461269 -1.070335 1.073995  
9 -2.601186 0.409990 -0.004385

**te(cf3)2**

6 1.580477 -0.523012 -0.000025  
6 -1.580477 -0.523011 0.000009  
9 1.540400 -1.305940 1.073002  
9 2.747918 0.125374 -0.000272  
9 1.540040 -1.306311 -1.072710  
9 -1.540554 -1.305700 -1.073181  
9 -1.539887 -1.306550 1.072531  
9 -2.747920 0.125374 0.000644

52 0.000001 0.981537 -0.000001

**cf3br\_acetone**

6 2.395255 0.116353 -0.003360  
9 2.900497 0.017292 1.217864  
9 2.596555 1.353190 -0.437987  
9 3.053776 -0.716056 -0.796359  
35 0.513178 -0.299394 0.004970  
6 -3.281298 -0.002544 0.000275  
8 -2.407223 -0.836742 0.008909  
6 -4.734818 -0.389689 -0.011230  
1 -5.274230 0.120050 0.791628  
1 -5.190387 -0.066910 -0.952308  
1 -4.837937 -1.468094 0.092167  
6 -2.979147 1.470891 0.002744  
1 -3.526792 1.976823 -0.796680  
1 -3.321345 1.908429 0.945607  
1 -1.910154 1.642520 -0.107858

**cf3br\_acn**

6 2.189675 0.000205 0.000042  
9 2.657118 0.105000 1.236329  
9 2.656935 1.018653 -0.708692  
9 2.657568 -1.122619 -0.527424  
35 0.265487 -0.000345 -0.000047  
6 -4.002375 -0.000005 -0.000099  
7 -2.854152 -0.000517 -0.000344  
6 -5.451184 0.000532 0.000245  
1 -5.825189 -0.932864 -0.423208  
1 -5.824459 0.100624 1.020563  
1 -5.824608 0.834229 -0.596343

**cf3br\_diethylether**

6 2.415513 0.000005 0.092360  
9 2.781647 1.077329 0.770233  
9 3.056786 -0.005422 -1.065722  
9 2.780251 -1.071888 0.779536  
8 -2.484775 -0.000019 -0.193117  
6 -2.767377 -1.174721 0.533254  
1 -3.816324 -1.159215 0.866073  
6 -2.767513 1.174664 0.533234  
1 -2.140507 1.215904 1.437501  
1 -3.816497 1.159111 0.865936  
6 -2.509334 2.368820 -0.349644  
1 -2.734238 3.292441 0.187878  
1 -1.464138 2.399348 -0.662961  
1 -3.134920 2.325510 -1.243157  
6 -2.509241 -2.368855 -0.349668  
1 -2.733907 -3.292499 0.187912  
1 -3.135012 -2.325639 -1.243054  
1 -1.464104 -2.399248 -0.663199  
1 -2.140268 -1.215943 1.437451  
35 0.506219 0.000021 -0.192545

**cf3br\_dmf**

6 -2.820557 0.236737 -0.000805  
9 -3.366654 0.090083 1.198805  
9 -3.545683 -0.448609 -0.873897  
9 -2.881364 1.521593 -0.329036  
6 2.430285 0.095752 0.002287  
8 1.833010 -0.962645 0.002236  
7 3.769499 0.238497 -0.000161  
1 1.902753 1.067038 0.004379  
6 4.630564 -0.917151 -0.003291  
1 4.010292 -1.811341 -0.003333  
1 5.268665 -0.917587 -0.892435  
1 5.271978 -0.919979 0.883461  
6 4.390940 1.535287 0.000140  
1 5.020759 1.666918 0.886048  
1 5.017163 1.669074 -0.887990  
1 3.624936 2.311711 0.002634  
35 -0.994606 -0.377300 0.001075

**cf3br\_dms0**

6 2.485049 0.217213 0.002835  
9 2.503057 1.543291 -0.065133  
9 3.159657 -0.260043 -1.033186  
9 3.110478 -0.149159 1.112448  
35 0.669037 -0.435493 -0.005232  
16 -3.163720 -0.233427 -0.004522  
8 -2.084133 -1.256580 -0.020455  
6 -2.799496 0.925948 -1.329390  
1 -2.911856 0.378949 -2.265455  
1 -3.509407 1.754310 -1.296844  
1 -1.772796 1.281139 -1.226545  
6 -2.800636 0.882169 1.357679  
1 -3.508615 1.712775 1.349995  
1 -2.916390 0.305724 2.275484  
1 -1.772890 1.238054 1.268549

**cf3br\_methanol**

6 1.705669 0.110656 -0.022026  
9 1.943262 1.339760 -0.457284  
9 2.296954 -0.744632 -0.843365  
9 2.248584 -0.019414 1.179110  
6 -3.685474 0.727018 -0.017010  
1 -3.388299 1.242003 0.896701  
1 -3.318506 1.306383 -0.872412  
1 -4.780398 0.693209 -0.052661  
8 -3.117841 -0.566454 0.035745  
1 -3.364861 -1.044418 -0.759037  
35 -0.192159 -0.224943 0.052272

**cf3br\_water**

6 -1.341124 0.000091 0.021920  
9 -1.825620 1.127385 -0.477909  
9 -1.758715 -0.114277 1.274789  
9 -1.833690 -1.012543 -0.675991  
35 0.584896 -0.000243 -0.051711

8 3.564486 0.000177 -0.034520  
1 3.910573 0.764186 0.432582  
1 3.911159 -0.762741 0.433962

**cf3i\_acetone**

6 2.483821 0.161040 -0.002178  
9 3.070531 -0.360486 1.070506  
9 2.716442 1.470749 0.000088  
9 3.065517 -0.355816 -1.079842  
6 -3.434787 0.044799 -0.001378  
8 -2.523116 -0.751050 0.004323  
6 -4.865830 -0.412941 -0.004639  
1 -5.435860 0.098994 0.775085  
1 -5.326830 -0.145339 -0.960442  
1 -4.918115 -1.490970 0.134085  
6 -3.201486 1.528725 -0.000978  
1 -3.821371 2.018516 -0.755919  
1 -3.504026 1.935144 0.969273  
1 -2.150290 1.754418 -0.170510  
53 0.373183 -0.243059 0.002115

**cf3i\_acn**

6 -2.288256 0.000734 0.000012  
9 -2.765445 -1.238543 0.066988  
9 -2.764197 0.562864 -1.107005  
9 -2.764123 0.678872 1.040049  
6 4.083667 -0.000163 -0.000031  
7 2.935911 -0.001897 -0.000110  
6 5.531888 0.002057 0.000072  
1 5.903700 0.522662 0.883848  
1 5.906169 -1.022729 0.008582  
1 5.903868 0.507976 -0.892130  
53 -0.143114 -0.000738 -0.000003

**cf3i\_diethylether**

6 2.538084 0.000008 0.111105  
9 2.949521 1.147632 0.638237  
9 3.153209 -0.163215 -1.054155  
9 2.916144 -0.984119 0.919126  
53 0.402617 -0.000263 -0.144315  
8 -2.611455 0.000213 -0.150909  
6 -2.978965 -1.176441 0.539841  
1 -4.047653 -1.128296 0.795171  
6 -2.977973 1.177096 0.539976  
1 -2.418580 1.244926 1.485419  
1 -4.046519 1.129510 0.795959  
6 -2.698717 2.370953 -0.336483  
1 -2.994322 3.289545 0.174720  
1 -1.636027 2.440302 -0.575809  
1 -3.258036 2.297621 -1.270977  
6 -2.699768 -2.370500 -0.336363  
1 -2.996737 -3.288855 0.174483  
1 -3.257964 -2.296673 -1.271486  
1 -1.636871 -2.440718 -0.574491

1 -2.420183 -1.244500 1.485642  
**cf3i\_dmf**  
 6 -2.879145 0.266972 -0.000783  
 9 -3.364695 0.311902 1.237570  
 9 -3.604831 -0.608934 -0.690907  
 9 -3.058241 1.466499 -0.550671  
 53 -0.800442 -0.278722 0.000824  
 6 2.693390 0.222949 0.001549  
 8 2.007592 -0.784498 0.001500  
 7 4.035966 0.247723 -0.000236  
 1 2.247372 1.232867 0.003125  
 6 4.795000 -0.978477 -0.002611  
 1 4.101737 -1.817083 -0.002460  
 1 5.430489 -1.032133 -0.891631  
 1 5.433108 -1.033972 0.884414  
 6 4.768250 1.486559 -0.000055  
 1 5.406251 1.561235 0.886199  
 1 5.403594 1.563081 -0.888062  
 1 4.073331 2.326954 0.001857  
**cf3i\_dmsO**  
 6 -2.582493 0.293641 -0.000483  
 9 -2.669778 1.578589 -0.341454  
 9 -3.131741 0.155098 1.203502  
 9 -3.311547 -0.406796 -0.864783  
 16 3.340772 -0.210645 0.000748  
 8 2.187049 -1.156370 0.002012  
 53 -0.532376 -0.365389 0.000626  
 6 3.059972 0.947887 1.343792  
 1 3.131864 0.379057 2.270736  
 1 3.829121 1.721809 1.323124  
 1 2.062269 1.379260 1.247277  
 6 3.061377 0.942476 -1.347230  
 1 3.830279 1.716721 -1.328697  
 1 3.134713 0.369933 -2.271747  
 1 2.063435 1.374074 -1.253798  
**cf3i\_methanol**  
 6 -1.900594 0.135344 0.023519  
 9 -2.235760 1.247802 -0.621469  
 9 -2.330073 0.241873 1.276827  
 9 -2.542042 -0.879343 -0.545673  
 53 0.226160 -0.171711 -0.034125  
 6 3.815993 0.750224 0.022600  
 1 3.480017 1.328572 -0.837843  
 1 3.577063 1.312753 0.931941  
 1 4.901555 0.623246 -0.047423  
 8 3.140024 -0.492931 -0.027967  
 1 3.413200 -1.026812 0.721780  
**cf3i\_water**  
 6 1.593606 -0.000251 0.025038  
 9 2.097000 -0.669680 -1.006009  
 9 2.035057 -0.571176 1.141056

9 2.068479 1.239937 -0.017762  
 8 -3.529733 -0.000554 -0.017569  
 1 -3.893209 -0.766745 0.433378  
 1 -3.894030 0.763022 0.437038  
 53 -0.553611 0.000338 -0.036522  
**se(cf3)2\_acetone**  
 6 3.441848 -0.489787 -0.002879  
 8 2.546340 -0.652870 -0.798016  
 6 4.882347 -0.487874 -0.433397  
 1 5.401247 0.388824 -0.036610  
 1 5.384386 -1.367031 -0.017749  
 1 4.952111 -0.509455 -1.519187  
 6 3.177769 -0.267790 1.460777  
 1 3.872683 -0.841124 2.078635  
 1 3.342624 0.789832 1.690027  
 1 2.148862 -0.524466 1.706994  
 34 -0.422799 -0.588372 -0.229500  
 6 -0.318929 1.378118 -0.068854  
 6 -2.367811 -0.665900 0.102157  
 9 0.959612 1.722047 0.058992  
 9 -0.978683 1.828824 0.994955  
 9 -0.806083 1.998543 -1.136987  
 9 -2.697592 -0.411101 1.364947  
 9 -3.062226 0.164562 -0.669399  
 9 -2.747118 -1.915047 -0.174932  
**se(cf3)2\_acn**  
 6 4.096906 -0.663419 0.005678  
 7 2.963019 -0.824348 -0.077858  
 6 5.527108 -0.457981 0.110736  
 1 5.899905 -0.891860 1.039809  
 1 6.035627 -0.931831 -0.730275  
 1 5.751647 0.609753 0.103809  
 34 -0.258366 -0.629019 -0.096369  
 6 -0.084806 1.336042 -0.011340  
 6 -2.224426 -0.627895 0.048922  
 9 1.145798 1.658086 -0.392301  
 9 -0.272696 1.807870 1.217796  
 9 -0.948582 1.952356 -0.813344  
 9 -2.833918 -0.184432 -1.046012  
 9 -2.669955 0.091667 1.074724  
 9 -2.590932 -1.897710 0.235162  
**se(cf3)2\_diethylether**  
 8 -2.571872 -0.069107 -0.571189  
 6 -3.326031 -1.052615 0.102120  
 1 -4.367276 -1.020330 -0.253176  
 6 -3.096772 1.228489 -0.391804  
 1 -3.030128 1.513938 0.669306  
 1 -4.163838 1.231150 -0.661399  
 6 -2.336185 2.201799 -1.256043  
 1 -2.756846 3.204091 -1.149566  
 1 -1.283556 2.240172 -0.972498

1 -2.398129 1.909410 -2.306143  
6 -2.722345 -2.408473 -0.160178  
1 -3.317080 -3.184949 0.325972  
1 -2.694018 -2.614735 -1.232080  
1 -1.703830 -2.465214 0.228443  
1 -3.343891 -0.837729 1.180920  
34 0.507427 -0.327338 -0.526055  
6 0.273327 0.318457 1.328114  
6 2.470277 -0.118265 -0.541934  
9 0.125383 1.640222 1.380724  
9 -0.824933 -0.232113 1.838329  
9 1.300905 -0.005266 2.104427  
9 2.861439 1.087394 -0.139918  
9 2.851423 -0.284459 -1.809542  
9 3.108832 -1.017979 0.197530  
**se(cf3)2\_dmf**  
6 2.575131 -0.456778 0.060558  
8 1.934534 -0.034893 -0.885650  
7 3.914639 -0.439676 0.161322  
1 2.085774 -0.902401 0.944102  
6 4.724797 0.113149 -0.895503  
1 4.068290 0.464346 -1.689020  
1 5.321813 0.950035 -0.520755  
1 5.403766 -0.646636 -1.294234  
6 4.590846 -0.957336 1.320976  
1 5.266013 -1.774003 1.046238  
1 5.179813 -0.174865 1.809977  
1 3.860062 -1.337600 2.035536  
34 -0.820152 -0.481785 -0.511242  
6 -0.572160 1.361625 0.171752  
6 -2.676251 -0.704274 0.125506  
9 -1.727906 1.915039 0.528653  
9 -0.019092 2.124359 -0.758781  
9 0.227320 1.377724 1.240112  
9 -3.558475 0.083963 -0.480551  
9 -3.000796 -1.971445 -0.155572  
9 -2.813639 -0.527378 1.437987  
**se(cf3)2\_dmsO**  
16 3.270760 -0.754085 -0.291429  
8 2.007412 -0.553530 -1.054914  
34 -0.722521 -0.558096 -0.444450  
6 -2.603397 -0.477651 0.154527  
6 -0.266383 1.306785 0.033596  
9 -1.343926 2.025872 0.328784  
9 0.368350 1.903880 -0.963857  
9 0.542703 1.347087 1.102619  
9 -3.367132 0.346165 -0.555918  
9 -3.079250 -1.717263 -0.006537  
9 -2.741927 -0.148862 1.437446  
6 3.850999 0.877470 0.185807  
1 4.734266 0.776307 0.818959

1 4.114380 1.397090 -0.735404  
1 3.053342 1.412220 0.702039  
6 2.806333 -1.311418 1.351864  
1 2.364772 -2.301315 1.237188  
1 3.698781 -1.374813 1.976893  
1 2.074024 -0.623679 1.776217

**se(cf3)2\_methanol**

6 -1.893542 -0.553100 0.017094  
9 -2.277029 -1.831739 0.079339  
9 -2.470516 -0.005595 -1.047104  
9 -2.356303 0.071747 1.094910  
6 3.501724 -1.616088 0.107576  
1 3.078116 -2.084389 0.996267  
1 3.258047 -2.238442 -0.761372  
1 4.590085 -1.576063 0.224183  
8 2.936232 -0.324115 0.014310  
1 3.278735 0.117014 -0.766588  
34 0.077653 -0.597701 -0.076733  
6 0.358894 1.360846 0.017726  
9 -0.766234 2.031658 -0.202537  
9 1.244087 1.733048 -0.908042  
9 0.832938 1.728289 1.199833

**se(cf3)2\_water**

6 -1.780266 -0.081916 0.000275  
9 -2.063155 0.648816 -1.072790  
9 -2.061767 0.648903 1.073659  
9 -2.586208 -1.146875 0.000815  
8 2.875570 -1.554106 0.000563  
1 3.323554 -1.177191 -0.761225  
1 3.321371 -1.182096 0.766019  
34 0.052904 -0.815671 -0.000802  
6 1.000136 0.922240 -0.000061  
9 0.166138 1.952638 -0.001445  
9 1.784146 1.031037 1.074019  
9 1.786687 1.030257 -1.072404

**te(cf3)2\_acetone**

6 3.392270 -0.454747 0.128993  
8 2.472732 -0.850735 -0.553657  
6 4.816498 -0.679672 -0.285629  
1 5.382639 0.253689 -0.226653  
1 5.286543 -1.378170 0.413682  
1 4.860203 -1.087723 -1.293330  
6 3.168559 0.294313 1.409845  
1 3.926006 0.047542 2.155971  
1 3.255932 1.365247 1.198849  
1 2.169883 0.103237 1.800065  
6 -0.001751 1.432773 -0.219770  
6 -2.503817 -0.346849 0.214741  
9 1.113408 1.696884 -0.902225  
9 0.154952 1.944394 1.005828  
9 -1.002768 2.091421 -0.798718

9 -2.706884 0.499782 1.226617  
9 -3.174282 0.125146 -0.836178  
9 -3.057907 -1.522423 0.547721  
52 -0.381390 -0.720956 -0.178766

**te(cf3)2\_acn**

6 3.509691 -0.794422 0.007745  
7 2.605047 -1.501834 -0.020141  
6 4.626685 0.123840 0.038991  
1 5.302051 -0.132215 0.856609  
1 5.172916 0.081703 -0.904388  
1 4.251588 1.138034 0.189276  
6 0.619624 1.148593 -0.012662  
6 -2.353278 0.061874 0.013162  
9 1.401078 1.308811 -1.086133  
9 1.403024 1.313910 1.059706  
9 -0.273633 2.133361 -0.013635  
9 -2.626363 0.805293 -1.058004  
9 -2.602702 0.806715 1.089204  
9 -3.212766 -0.967868 0.023214  
52 -0.349538 -0.815692 -0.007944

**te(cf3)2\_diethylether**

8 -2.540538 -0.508585 0.044370  
6 -3.262479 0.019126 1.142785  
1 -4.288910 -0.373645 1.111809  
6 -3.210814 -0.282686 -1.183088  
1 -3.252654 0.796422 -1.387472  
1 -4.246622 -0.639536 -1.090242  
6 -2.508046 -1.012328 -2.298151  
1 -3.065424 -0.885694 -3.228841  
1 -1.498788 -0.628833 -2.451618  
1 -2.442747 -2.079670 -2.077774  
6 -2.594872 -0.372072 2.435294  
1 -3.188289 -0.013746 3.279209  
1 -2.508993 -1.457862 2.510926  
1 -1.596878 0.060523 2.514734  
1 -3.326174 1.112367 1.051817  
6 0.003431 1.478554 -0.181872  
6 2.602513 -0.321791 0.029309  
9 -0.621617 1.694138 -1.342153  
9 -0.792317 1.947830 0.782391  
9 1.115649 2.207978 -0.179696  
9 3.016839 0.211299 -1.119262  
9 3.169037 -1.532598 0.144054  
9 3.075227 0.438919 1.015324  
52 0.440308 -0.645819 0.116172

**te(cf3)2\_dmf**

6 2.712082 -0.462746 0.300516  
8 1.971877 -0.521086 -0.671431  
7 4.042424 -0.331995 0.244630  
1 2.323444 -0.512627 1.330284  
6 4.722943 -0.233892 -1.024091

1 3.984871 -0.285255 -1.821633  
1 5.264862 0.713887 -1.090508  
1 5.438761 -1.053359 -1.135977  
6 4.844055 -0.265236 1.439189  
1 5.572779 -1.081148 1.462614  
1 5.386857 0.683588 1.487696  
1 4.204661 -0.344402 2.318712  
6 -0.252321 1.441062 -0.085900  
6 -2.836166 -0.343042 0.262376  
9 -1.343437 2.167209 0.152007  
9 0.311482 1.905844 -1.198108  
9 0.607240 1.675179 0.916627  
9 -3.502955 0.410262 -0.613879  
9 -3.421216 -1.554159 0.275237  
9 -3.019704 0.199610 1.468643  
52 -0.732201 -0.686162 -0.254797

**te(cf3)2\_dms0**

16 3.361050 -0.766185 -0.177014  
8 2.037905 -0.752090 -0.874258  
6 -2.711151 -0.243444 0.222194  
6 -0.048296 1.416352 -0.017512  
9 -1.105101 2.194587 0.200272  
9 0.606470 1.903173 -1.069756  
9 0.769967 1.559029 1.043702  
9 -3.340638 0.579030 -0.618302  
9 -3.354549 -1.423538 0.184470  
9 -2.865598 0.255311 1.451615  
52 -0.626997 -0.668996 -0.314667  
6 3.921781 0.935783 -0.102280  
1 4.858569 0.976475 0.456347  
1 4.090838 1.253478 -1.131022  
1 3.156426 1.557484 0.361522  
6 3.027552 -0.979490 1.572513  
1 2.610486 -1.978838 1.696581  
1 3.964929 -0.899261 2.125590  
1 2.308263 -0.229420 1.902487

**te(cf3)2\_water**

6 -1.915719 0.113891 0.000089  
9 -2.152171 0.866140 -1.073806  
9 -2.151718 0.866463 1.073866  
9 -2.809109 -0.886886 0.000415  
8 2.889137 -1.382395 0.000172  
1 3.313244 -0.981025 -0.763704  
1 3.312702 -0.983322 0.765540  
52 0.060324 -0.828034 -0.000146  
6 1.093226 1.099098 -0.000023  
9 0.241824 2.117786 -0.000584  
9 1.883769 1.229337 -1.073489  
9 1.882858 1.229754 1.074040

**dcm**

6 -0.000000 -0.000000 0.759090

|    |           |           |           |
|----|-----------|-----------|-----------|
| 1  | -0.896963 | 0.000000  | 1.372342  |
| 17 | 0.000000  | 1.470398  | -0.214683 |
| 17 | -0.000000 | -1.470398 | -0.214683 |
| 1  | 0.896963  | -0.000000 | 1.372342  |

**tcm**

|    |           |           |           |
|----|-----------|-----------|-----------|
| 17 | -0.000000 | 1.677584  | -0.083387 |
| 6  | -0.000000 | -0.000000 | 0.452482  |
| 1  | -0.000000 | -0.000000 | 1.537850  |
| 17 | -1.452830 | -0.838792 | -0.083387 |
| 17 | 1.452830  | -0.838792 | -0.083387 |

**cf3br\_dcm**

|    |           |           |           |
|----|-----------|-----------|-----------|
| 6  | -1.886492 | 0.492270  | 0.163166  |
| 9  | -1.910606 | 1.287180  | -0.888758 |
| 9  | -1.277845 | 1.119374  | 1.158577  |
| 9  | -3.128389 | 0.227790  | 0.528199  |
| 35 | -0.948721 | -1.145039 | -0.253035 |
| 6  | 2.301068  | 0.457317  | 0.755321  |
| 1  | 1.380784  | 0.226799  | 1.284462  |
| 17 | 2.968869  | -1.053527 | 0.136233  |
| 17 | 1.922323  | 1.614412  | -0.520634 |
| 1  | 3.038288  | 0.907904  | 1.413522  |

**cf3br\_tcm**

|    |           |           |           |
|----|-----------|-----------|-----------|
| 6  | 2.199344  | -0.717643 | -0.129570 |
| 9  | 3.366875  | -0.824828 | -0.735556 |
| 9  | 1.307482  | -1.435900 | -0.795477 |
| 9  | 2.304919  | -1.198078 | 1.093648  |
| 6  | -1.934411 | -0.084540 | -0.136513 |
| 1  | -1.050983 | -0.108576 | -0.766435 |
| 17 | -2.351551 | 1.605556  | 0.130827  |
| 17 | -3.224313 | -0.933159 | -0.981160 |
| 17 | -1.530179 | -0.885435 | 1.378708  |
| 35 | 1.641447  | 1.133502  | -0.076656 |

**cf3I\_dcm**

|    |           |           |           |
|----|-----------|-----------|-----------|
| 6  | -2.552261 | 0.378225  | 0.149150  |
| 9  | -3.084380 | 0.805640  | -0.985875 |
| 9  | -2.464726 | 1.403957  | 0.984053  |
| 9  | -3.364025 | -0.524810 | 0.679191  |
| 6  | 3.051237  | 0.279673  | 0.844298  |
| 1  | 2.160996  | 0.423243  | 1.450858  |
| 17 | 2.925965  | -1.302671 | 0.063602  |
| 17 | 3.152693  | 1.602921  | -0.311751 |
| 1  | 3.952845  | 0.280886  | 1.449957  |
| 53 | -0.608051 | -0.470167 | -0.202628 |

**cf3I\_tcm**

|    |           |           |           |
|----|-----------|-----------|-----------|
| 6  | -2.890595 | 0.633760  | -0.206995 |
| 9  | -3.762990 | 0.073110  | -1.029304 |
| 9  | -2.485427 | 1.777576  | -0.737922 |
| 9  | -3.497643 | 0.892894  | 0.939905  |
| 6  | 2.542838  | 0.265708  | -0.162385 |
| 1  | 1.632887  | 0.584079  | -0.662606 |
| 17 | 2.475679  | -1.493475 | -0.017107 |

|    |           |           |           |
|----|-----------|-----------|-----------|
| 17 | 3.911387  | 0.764721  | -1.146498 |
| 53 | -1.212056 | -0.674414 | 0.111859  |
| 17 | 2.578061  | 1.027040  | 1.422208  |

**Se(cf3)2\_dcm**

|    |           |           |           |
|----|-----------|-----------|-----------|
| 34 | -0.609712 | -0.465541 | -0.605246 |
| 6  | -0.559739 | 1.482226  | -0.279205 |
| 6  | -2.283485 | -0.804721 | 0.380942  |
| 9  | -1.635173 | 2.096815  | -0.757387 |
| 9  | 0.510896  | 1.947179  | -0.911639 |
| 9  | -0.459553 | 1.782951  | 1.007590  |
| 9  | -2.206745 | -0.454740 | 1.658646  |
| 9  | -3.329271 | -0.183967 | -0.148025 |
| 9  | -2.496127 | -2.118713 | 0.315792  |
| 17 | 3.041808  | -0.814817 | -1.191372 |
| 6  | 2.953155  | -1.063938 | 0.555302  |
| 1  | 3.842546  | -1.606404 | 0.862687  |
| 17 | 2.883198  | 0.447296  | 1.457349  |
| 1  | 2.046756  | -1.624468 | 0.767038  |

**Se(cf3)2\_tcm**

|    |           |           |           |
|----|-----------|-----------|-----------|
| 34 | -0.829905 | -0.304863 | -0.561645 |
| 6  | -1.160297 | 1.545553  | 0.036394  |
| 6  | -2.512913 | -1.051471 | 0.143510  |
| 9  | -2.336060 | 2.008981  | -0.370507 |
| 9  | -0.200764 | 2.299426  | -0.492514 |
| 9  | -1.111013 | 1.672335  | 1.356819  |
| 9  | -2.677165 | -0.809891 | 1.438362  |
| 9  | -3.586634 | -0.599190 | -0.491888 |
| 9  | -2.445278 | -2.369513 | -0.037267 |
| 17 | 2.754164  | 0.488374  | -1.433225 |
| 6  | 3.231365  | -0.167758 | 0.133230  |
| 1  | 4.307163  | -0.053509 | 0.220031  |
| 17 | 2.486676  | 0.729019  | 1.450677  |
| 17 | 2.863449  | -1.885536 | 0.239610  |

**Te(cf3)2\_dcm**

|    |           |           |           |
|----|-----------|-----------|-----------|
| 6  | -0.337226 | 1.562561  | -0.420179 |
| 6  | -2.489380 | -0.529829 | 0.536910  |
| 9  | -1.372149 | 2.159631  | -1.005856 |
| 9  | 0.766068  | 1.879924  | -1.094535 |
| 9  | -0.232283 | 2.054471  | 0.809268  |
| 9  | -2.449013 | 0.103612  | 1.705728  |
| 9  | -3.417713 | 0.060687  | -0.208935 |
| 9  | -2.877679 | -1.789730 | 0.759503  |
| 17 | 3.109721  | -1.001661 | -1.010398 |
| 6  | 3.198414  | -0.968169 | 0.756394  |
| 1  | 4.150283  | -1.401383 | 1.049765  |
| 17 | 3.098109  | 0.661680  | 1.411003  |
| 1  | 2.359454  | -1.541068 | 1.142383  |
| 52 | -0.539015 | -0.613127 | -0.440918 |

**Te(cf3)2\_tcm**

|   |          |           |          |
|---|----------|-----------|----------|
| 6 | 1.423476 | 1.718212  | 0.034996 |
| 6 | 2.605421 | -1.193519 | 0.127656 |

|    |           |           |           |
|----|-----------|-----------|-----------|
| 9  | 1.821260  | 1.965973  | 1.279396  |
| 9  | 0.447025  | 2.578861  | -0.264277 |
| 9  | 2.452430  | 1.961972  | -0.771804 |
| 9  | 3.480971  | -0.893431 | -0.827180 |
| 9  | 3.139430  | -0.829795 | 1.290469  |
| 9  | 2.446404  | -2.520689 | 0.139075  |
| 17 | -2.744815 | 1.433829  | -0.429310 |
| 6  | -3.576754 | -0.057483 | 0.011715  |
| 1  | -4.643550 | 0.126923  | -0.066185 |
| 17 | -3.174818 | -1.358100 | -1.107114 |
| 52 | 0.640040  | -0.304987 | -0.209585 |
| 17 | -3.223842 | -0.513193 | 1.672149  |
